# Supplementary material for: Oscillatory Deficits in the Sub-Chronic PCP Rat Model for Schizophrenia Are Reversed by mGlu5 Receptor-Positive Allosteric Modulators VU0409551 and VU0360172
Source: MDPI journal article supplement (doi:10.3390/cells12060919), 2023-03-16
Supplement: s1 [file s1]

## Supplementary Material

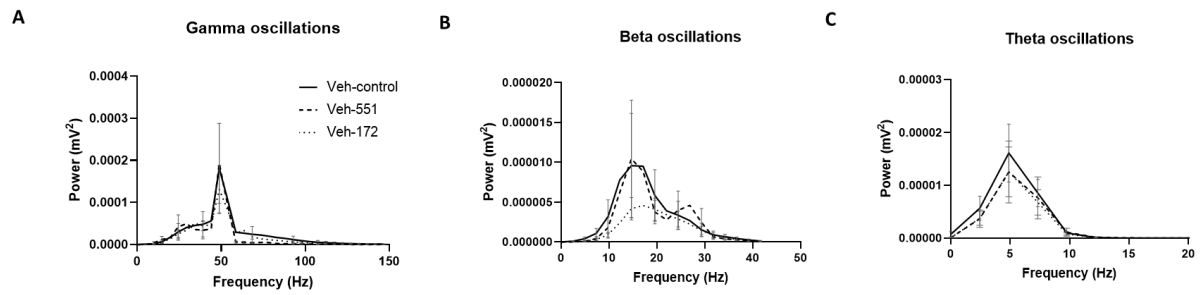

**Figure S1** Supplementary Material. The mGlu5 receptor PAMs have little effect on oscillatory power in slices from scVehicle rats. Power spectral analyses for **A**, gamma-band (25 – 100 Hz) **B**, beta-band (12.5 – 30 Hz) and **C**, theta-band (4 – 7 Hz) oscillations show the effect of VU0409551 or VU0360172 incubation of PFC slices from scVehicle animals on power (mV<sup>2</sup>; n = 10 per group, analysed using a 2-way ANOVA matched by animal and frequency).
